# Supplementary material for: Dramatic enhancement of the photocatalytic activity of Cd0.5Zn0.5S nanosheets via phosphorization calcination for visible-light-driven H2 evolution
Source: Royal Society of Chemistry journal article supplement (doi:10.1039/c7ta04589a), 2017-01-01
Supplement: c7ta04589a1.pdf [file c7ta04589a1.pdf]

## Supplementary Data

# **Dramatic enhancement of the photocatalytic activity of Cd<sub>0.5</sub>Zn<sub>0.5</sub>S nanosheets via phosphorization calcination for visible-light-driven H<sub>2</sub> evolution**

Xing Liu, Xiangqing Li, Lixia Qin, Jin Mu, Shi-Zhao Kang\*

*Center of Graphene Research, School of Chemical and Environmental Engineering,  
Shanghai Institute of Technology, 100 Haiquan Road, Shanghai 201418, China*

\* Corresponding author: Shi-Zhao Kang, Tel./fax: +86 21 60873061.

*E-mail address:* kangsz@sit.edu.cn (S.-Z. Kang)

Supplementary Fig. S1

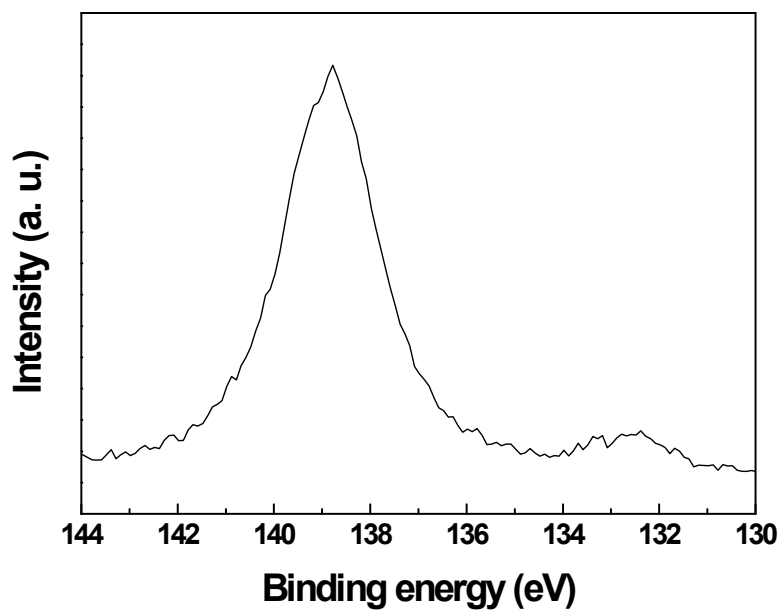

**Fig. S1.** High-resolution XPS spectrum of P 2p of the used CZS-P.
